# Supplementary material for: Structure of hydrated cobalt ions confined in the nanospace of single-walled carbon nanotubes
Source: Royal Society of Chemistry journal article supplement (doi:10.1039/c3cp50181g), 2013-01-01
Supplement: c3cp50181g.pdf [file c3cp50181g.pdf]

## Electronic Supplementary Information

### Structure of Hydrated Cobalt Ion Confined in the Nanospace of Single-Wall Carbon Nanotube

Bashir Ahmmad,<sup>\*a,b</sup> Masayasu Nishi,<sup>b</sup> Fumihiko Hirose,<sup>a</sup> Takahiro Ohkubo<sup>b</sup> and Yasushige Kuroda<sup>b</sup>

<sup>a</sup> Graduate School of Science and Engineering, Yamagata University

4-3-16 Jonan, Yonezawa 992-8510, Japan.

<sup>b</sup> Department of Chemistry, Faculty of Science, Okayama University

3-1-1 Tsushimanaka, Kita-ku, Okayama 700-8530, Japan

E-mail: arima@yz.yamagata-u.ac.jp

**Co adsorption on SWNT:** 15 mg of SWNT or oxSWNT was added to a solution of 0.5 M cobalt acetate ( $\text{Co}(\text{OAc})_2$ ) in an glass tube. The tube was sealed using gas burner and shaken for 40 h at 303 K in a water bath. The cobalt ions together with water molecules get inside the carbon nanotube mainly by capillary action. The suspension was filtered and the Co ion adsorbed SWNT was washed several times to remove physically adsorbed Co ions from the surface of SWNT. Finally, the samples were dried at 100° C for overnight.

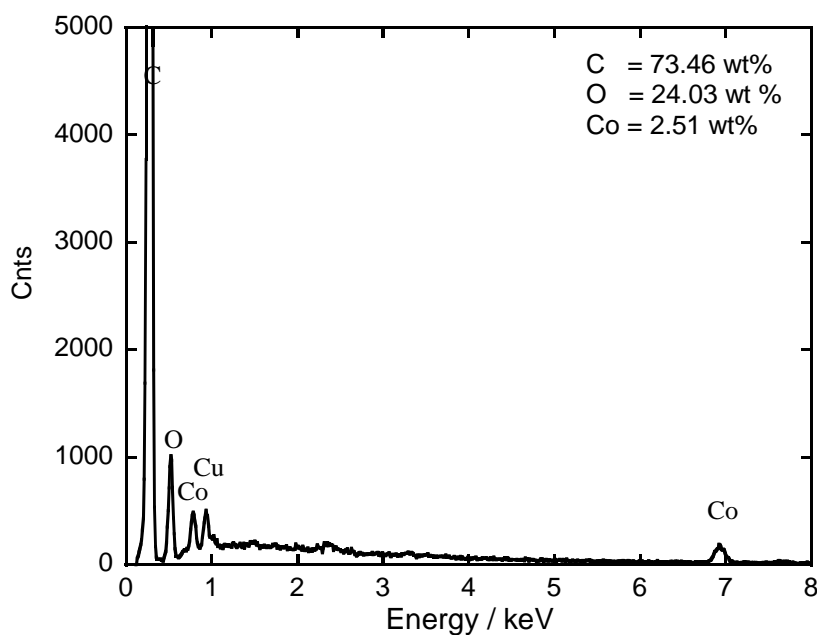

**Fig. S1:** EDX spectra of Co adsorbed oxSWNT (The peak for Cu arises from the sample substrate).
